# Supplementary material
Source: PubMed Central journal article supplement (PMC3251152)
Supplement: 1116439108_pnas.1116439108_SI.pdf [file 1116439108_pnas.1116439108_SI.pdf]

# Supporting Information

Castillo et al. 10.1073/pnas.1116439108

## SI Text

**1. The Three-State Model.** We define the reaction as

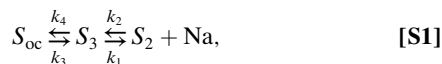

where  $S$  represents states. If  $P_2$ ,  $P_3$ , and  $P_{oc}$  are the probabilities of being in states  $S_2$ ,  $S_3$ , and  $S_{oc}$ , respectively,

$$P_2 + P_3 + P_{oc} = 1. \quad [\text{S2}]$$

The first reaction is given by

$$\frac{dP_{oc}}{dt} = P_3 k_3 - P_{oc} k_4. \quad [\text{S3}]$$

Assuming that the last reaction is in equilibrium, we have

$$\frac{P_2[\text{Na}]}{P_3} = \frac{k_2}{k_1} = K, \quad [\text{S4}]$$

and combining [S2], [S3], and [S4] we get

$$\frac{dP_{oc}}{dt} = \frac{k_3}{1 + \frac{K}{[\text{Na}]}} - P_{oc} \left( k_4 + \frac{k_3}{1 + \frac{K}{[\text{Na}]}} \right). \quad [\text{S5}]$$

The solution of [S5] is a single exponential with rate constant

$$k_s = k_4 + \frac{k_3}{1 + \frac{K}{[\text{Na}]}}. \quad [\text{S6}]$$

The equilibrium constant  $K$  may be expressed as a function of the difference in free energy between the states  $S_3$  and  $S_2$ :

$$K = C^0 \exp(-\Delta G_T / RT), \quad [\text{S7}]$$

where  $C^0$  is standard state concentration of 1 mol/L ( $=1/1661 \text{ \AA}^3$ )—see ref. 1—and  $G_T$  is the absolute binding energy. By expanding the free energy in electrical and chemical terms,

$$K = C^0 \exp\left(\frac{z\delta FV - \Delta H_u + T\Delta S_u}{RT}\right). \quad [\text{S8}]$$

Separating the electrical term from all the chemical terms, we can write Eq S8 as

$$K = K(0) \exp\left(\frac{z\delta FV}{RT}\right), \quad [\text{S8a}]$$

where  $K(0)$  is the equilibrium constant at 0 mV. Combining [S8a] with [S6], we obtain

$$k_s = k_4 + \frac{k_3}{1 + \frac{K(0) \exp(\frac{z\delta FV}{RT})}{[\text{Na}]}}. \quad [\text{S9}]$$

Eq. S9 corresponds to Eq. 2 in the main text.

Expressing  $k_3$  and  $k_4$  in terms of their enthalpic and entropic components and replacing  $K$  by its explicit form Eq. S8 into Eq. S9, we obtain

$$k_s = A \exp\left(\frac{-\Delta H_4^\ddagger + T\Delta S_4^\ddagger}{RT}\right) + \frac{A \exp\left(\frac{-\Delta H_3^\ddagger + T\Delta S_3^\ddagger}{RT}\right)}{1 + \frac{C^0}{[\text{Na}]_0} \exp\left(\frac{z\delta FV - \Delta H_u + T\Delta S_u}{RT}\right)}, \quad [\text{S9a}]$$

where the preexponential factors are all the same and equal to  $A$ . Eq. S9a corresponds to Eq. 3 of the main text.

To compute the  $Q$ - $V$  curve, we consider Eq. S3 in the steady state:

$$P_3 k_3 - P_{oc} k_4 = 0. \quad [\text{S10}]$$

The charge movement occurs between  $S_2$  and  $S_3$ , and it is a maximum when the voltage is most negative. Then we are interested in state  $S_3$ , whose probability is obtained by combining Eqs S2, S4, and S10:

$$P_3 = \frac{\frac{[\text{Na}]}{K}}{1 + \frac{[\text{Na}]}{K} \left(1 + \frac{k_3}{k_4}\right)}. \quad [\text{S11}]$$

At very negative  $V$ , we have the maximum charge moved (in the inward direction), and its probability is equal to

$$P_3(V \rightarrow -\infty) = P_{-\infty} = \frac{k_4}{k_3 + k_4}, \quad [\text{S12}]$$

and normalizing the total charge by  $P_{-\infty}$  we have

$$P_{\text{nor}} = \frac{P_3}{k_4 / (k_3 + k_4)}, \quad [\text{S13}]$$

which can be written as

$$P_{\text{nor}} = \frac{1}{1 + \frac{KP_{-\infty}}{[\text{Na}]}}. \quad [\text{S14}]$$

Then  $P_{\text{nor}}$  is given by

$$P_{\text{nor}} = \frac{1}{1 + \frac{P_{-\infty} C^0 \exp(-\Delta G_T / RT)}{[\text{Na}]}}. \quad [\text{S15}]$$

and, by introducing explicitly the electrical and chemical terms

$$P_{\text{nor}} = \frac{1}{1 + \frac{P_{-\infty} C^0 \exp\left(\frac{-\Delta H + T\Delta S + z\delta FV}{RT}\right)}{[\text{Na}]}}. \quad [\text{S16}]$$

or

$$P_{\text{nor}} = \frac{1}{1 + \exp\left(\frac{z\delta FV - \Delta H + T\Delta S + RT \ln\left(\frac{C^0 P_{-\infty}}{[\text{Na}]}\right)}{RT}\right)}. \quad [\text{S17}]$$

that can be written as

$$P_{\text{nor}} = \frac{1}{1 + \exp\left(\frac{z\delta F(V - V_{1/2})}{RT}\right)}. \quad [\text{S18}]$$

from Eq. S17,  $V_{1/2}$  is defined as

$$V_{1/2} = \frac{\Delta H - T\Delta S - RT \ln P_{-\infty} + RT \ln[\text{Na}]/C^0}{z\delta F}. \quad [\text{S19}]$$

Expanding the  $P_{-\infty}$  term and assuming that  $k_3/k_4 \gg 1$ , we get

$$V_{1/2} = \frac{\Delta H - T\Delta S - RT \ln \frac{k_4}{k_3} + RT \ln[\text{Na}]/C^0}{z\delta F}, \quad [\text{S20}]$$

but we can replace  $k_4/k_3$  by the exponential relation to the change in free energy in the deoccluding step:

$$\frac{k_4}{k_3} = \exp(-\Delta G_o/RT) = \exp\left(\frac{-\Delta H_o + T\Delta S_o}{RT}\right). \quad [\text{S21}]$$

By replacing [S21] in [S20],

$$V_{1/2} = \frac{\Delta H - T\Delta S + \Delta H_o - T\Delta S_o + RT \ln[\text{Na}]/C^0}{z\delta F}. \quad [\text{S22}]$$

**2. Two-State Model.** We consider now only two states  $S_2$  and  $S_3$  (collapsing  $S_{oc}$  with  $S_3$ ) in the steady state:

$$P_3 = \frac{1}{1 + \frac{K}{[\text{Na}]}}. \quad [\text{S23}]$$

1. Woo HJ, Roux B (2005) Calculation of absolute protein-ligand binding free energy from computer simulations. *Proc Natl Acad Sci USA* 102:6825–6830.

$$P_3 = \frac{1}{1 + \frac{C^0 \exp(-\Delta G_T/RT)}{[\text{Na}]}}. \quad [\text{S24}]$$

$$\begin{aligned} P_3 &= \frac{1}{1 + \exp\left(\frac{-\Delta G_T - RT \ln([\text{Na}]/C^0)}{RT}\right)} \\ &= \frac{1}{1 + \exp\left(\frac{zF\delta V - \Delta H_T + T\Delta S_T - RT \ln([\text{Na}]/C^0)}{RT}\right)}. \end{aligned} \quad [\text{S25}]$$

By writing [S25] as

$$P_3 = \frac{1}{1 + \exp\left(\frac{zF\delta(V - V_{1/2})}{RT}\right)},$$

$V_{1/2}$  becomes

$$V_{1/2} = \frac{\Delta H_T - T\Delta S_T + RT \ln([\text{Na}]/C^0)}{z\delta F}, \quad [\text{S26}]$$

which corresponds to Eq. 4 in the main text. Comparing this equation with Eq. S22 we find that  $\Delta H_T = \Delta H + \Delta H_o$  and  $\Delta S_T = \Delta S + \Delta S_o$ .
